# Supplementary material for: Monkeypox Knowledge and Vaccine Hesitancy of Czech Healthcare Workers: A Health Belief Model (HBM)-Based Study
Source: MDPI journal article supplement (doi:10.3390/vaccines10122022), 2022-11-26
Supplement: s1 [file s1]

**Figure S1.** Sample size calculation via Epi-Info™; Population Survey module (StatCalc).

1

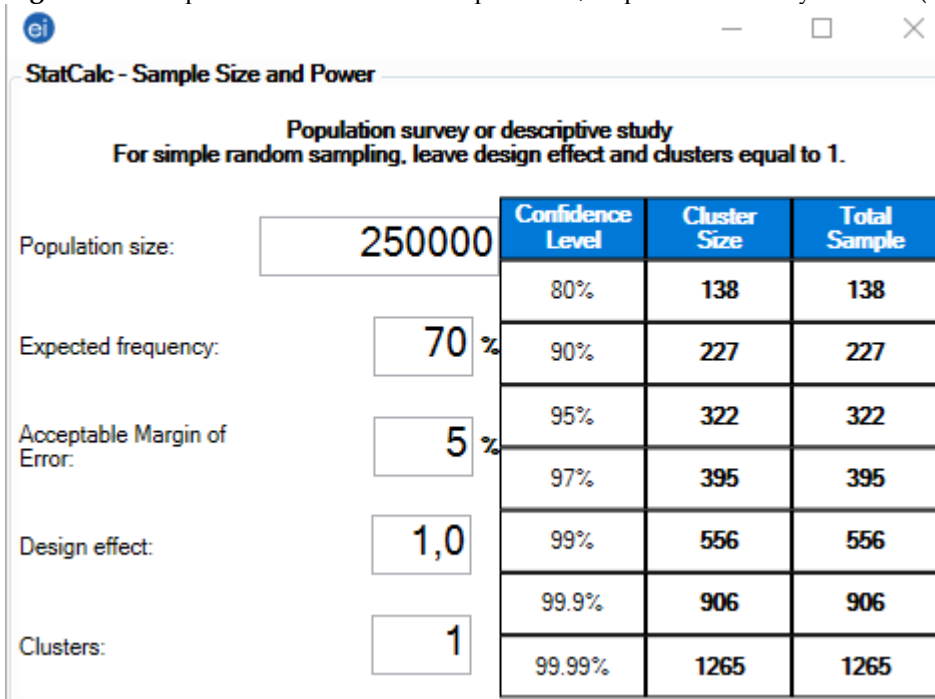

**StatCalc - Sample Size and Power**

Population survey or descriptive study  
For simple random sampling, leave design effect and clusters equal to 1.

Population size:

Expected frequency:  %

Acceptable Margin of Error:  %

Design effect:

Clusters:

| Confidence Level | Cluster Size | Total Sample |
|------------------|--------------|--------------|
| 80%              | 138          | 138          |
| 90%              | 227          | 227          |
| 95%              | 322          | 322          |
| 97%              | 395          | 395          |
| 99%              | 556          | 556          |
| 99.9%            | 906          | 906          |
| 99.99%           | 1265         | 1265         |

2

**Table S1.** Predictors of HMPXV-related Perceived Knowledge of Czech Healthcare Workers Responding to HMPXV vaccine Survey, September 2022, (*n* = 341)

3

| Variable           | Outcome           | Epidemiology | Sig.  | Clinical Presentation | Sig.  | Risk Factors | Sig.  | Vaccination | Sig.  | Treatment | Sig.  | Total      | Sig.  |
|--------------------|-------------------|--------------|-------|-----------------------|-------|--------------|-------|-------------|-------|-----------|-------|------------|-------|
| Gender             | Female            | 2.8 ± 0.9    |       | 3.1 ± 1.0             |       | 3.2 ± 0.9    |       | 2.8 ± 0.9   |       | 2.8 ± 0.9 |       | 14.6 ± 4.1 |       |
|                    | Male              | 2.8 ± 1.1    | 0.966 | 3.0 ± 1.2             | 0.936 | 3.2 ± 1.2    | 0.855 | 2.6 ± 1.1   | 0.487 | 2.8 ± 1.2 | 0.921 | 14.4 ± 5.0 | 0.972 |
|                    | Prefer not to say | 2.8 ± 1.3    |       | 2.8 ± 1.3             |       | 3.0 ± 1.4    |       | 2.8 ± 1.3   |       | 2.6 ± 1.1 |       | 14.0 ± 6.3 |       |
| Sexual Orientation | Heterosexual      | 2.8 ± 0.9    |       | 3.1 ± 1.0             |       | 3.2 ± 1.0    |       | 2.7 ± 1.0   |       | 2.8 ± 1.0 |       | 14.6 ± 4.2 |       |
|                    | Homosexual        | 2.8 ± 0.5    | 0.351 | 3.1 ± 0.8             | 0.992 | 3.6 ± 0.5    | 0.629 | 2.6 ± 0.7   | 0.635 | 2.6 ± 0.7 | 0.672 | 14.8 ± 1.5 | 0.930 |
|                    | Bisexual          | 3.4 ± 0.9    |       | 3.0 ± 1.2             |       | 3.0 ± 1.2    |       | 2.6 ± 1.1   |       | 2.4 ± 1.1 |       | 14.4 ± 5.1 |       |
|                    | Prefer not to say | 2.9 ± 0.9    |       | 3.1 ± 1.1             |       | 3.2 ± 1.1    |       | 2.9 ± 1.0   |       | 2.8 ± 1.0 |       | 14.9 ± 4.6 |       |

|                        |                          |           |        |           |        |           |        |           |       |           |        |            |        |
|------------------------|--------------------------|-----------|--------|-----------|--------|-----------|--------|-----------|-------|-----------|--------|------------|--------|
| Age Group              | ≤ 47 years-old           | 2.8 ± 1.0 | 0.523  | 3.1 ± 1.1 | 0.474  | 3.2 ± 1.1 | 0.809  | 2.6 ± 1.0 | 0.033 | 2.7 ± 1.0 | 0.249  | 14.4 ± 4.5 | 0.681  |
|                        | > 47 years-old           | 2.8 ± 0.8 |        | 3.0 ± 0.9 |        | 3.2 ± 0.9 |        | 2.8 ± 0.9 |       | 2.9 ± 0.9 |        | 14.7 ± 3.8 |        |
| Marital Status         | Single                   | 2.7 ± 1.0 | 0.513  | 2.9 ± 1.1 | 0.541  | 3.0 ± 1.1 | 0.190  | 2.5 ± 1.0 | 0.057 | 2.5 ± 1.1 | 0.035  | 13.6 ± 4.5 | 0.203  |
|                        | Married                  | 2.8 ± 0.9 |        | 3.1 ± 0.9 |        | 3.3 ± 0.9 |        | 2.8 ± 0.9 |       | 2.9 ± 0.9 |        | 14.9 ± 3.9 |        |
|                        | Divorced                 | 2.8 ± 1.0 |        | 3.0 ± 0.9 |        | 3.4 ± 0.9 |        | 3.0 ± 1.0 |       | 3.0 ± 0.9 |        | 15.2 ± 4.2 |        |
|                        | Widow                    | 2.4 ± 0.9 |        | 2.6 ± 1.2 |        | 2.8 ± 1.3 |        | 2.4 ± 0.9 |       | 2.4 ± 1.1 |        | 12.5 ± 5.2 |        |
|                        | Prefer not to say        | 2.9 ± 1.1 |        | 3.1 ± 1.1 |        | 3.1 ± 1.1 |        | 2.8 ± 0.9 |       | 2.8 ± 0.9 |        | 14.6 ± 4.8 |        |
| Having Minors          | Yes                      | 2.8 ± 1.0 | 0.720  | 3.1 ± 1.1 | 0.650  | 3.2 ± 1.1 | 0.753  | 2.8 ± 1.0 | 0.665 | 2.8 ± 1.0 | 0.763  | 14.7 ± 4.6 | 0.471  |
|                        | No                       | 2.8 ± 0.9 |        | 3.0 ± 0.9 |        | 3.2 ± 0.9 |        | 2.7 ± 0.9 |       | 2.8 ± 0.9 |        | 14.5 ± 3.9 |        |
| Location               | South Moravian Region    | 2.8 ± 0.9 | 0.669  | 3.1 ± 1.0 | 0.980  | 3.3 ± 0.9 | 0.060  | 2.8 ± 0.9 | 0.023 | 2.8 ± 0.9 | 0.300  | 14.8 ± 4.0 | 0.177  |
|                        | Other Regions            | 2.8 ± 1.0 |        | 3.1 ± 1.0 |        | 3.1 ± 1.0 |        | 2.6 ± 1.0 |       | 2.7 ± 1.0 |        | 14.3 ± 4.4 |        |
| Profession             | Medical                  | 2.8 ± 1.0 | 0.816  | 3.2 ± 1.1 | 0.346  | 3.2 ± 1.1 | 0.827  | 2.6 ± 1.2 | 0.568 | 2.7 ± 1.1 | 0.688  | 14.5 ± 4.8 | 0.945  |
|                        | Allied HCPs              | 2.8 ± 0.9 |        | 3.0 ± 1.0 |        | 3.2 ± 1.0 |        | 2.7 ± 0.9 |       | 2.8 ± 0.9 |        | 14.6 ± 4.1 |        |
| Providing Care         | Yes                      | 3.1 ± 1.1 | 0.142  | 3.4 ± 1.2 | 0.102  | 3.5 ± 1.2 | 0.160  | 2.8 ± 1.2 | 0.991 | 2.8 ± 1.0 | 0.994  | 15.6 ± 5.3 | 0.336  |
|                        | No                       | 2.8 ± 0.9 |        | 3.0 ± 1.0 |        | 3.2 ± 1.0 |        | 2.7 ± 0.9 |       | 2.8 ± 1.0 |        | 14.5 ± 4.1 |        |
| Chronic Illnesses      | Yes                      | 2.8 ± 0.9 | 0.349  | 3.0 ± 0.9 | 0.663  | 3.1 ± 1.0 | 0.085  | 2.8 ± 0.9 | 0.349 | 2.8 ± 0.9 | 0.611  | 14.5 ± 4.3 | 0.695  |
|                        | No                       | 2.8 ± 0.9 |        | 3.1 ± 1.0 |        | 3.3 ± 1.0 |        | 2.7 ± 1.0 |       | 2.8 ± 1.0 |        | 14.6 ± 4.1 |        |
| Medical Treatments     | Yes                      | 2.7 ± 0.9 | 0.302  | 3.0 ± 0.9 | 0.421  | 3.2 ± 0.9 | 0.150  | 2.7 ± 0.9 | 0.459 | 2.8 ± 0.9 | 0.632  | 14.3 ± 4.1 | 0.247  |
|                        | No                       | 2.9 ± 0.9 |        | 3.1 ± 1.0 |        | 3.3 ± 1.0 |        | 2.8 ± 1.0 |       | 2.8 ± 1.0 |        | 14.8 ± 4.3 |        |
| COVID-19 Vaccination   | Yes                      | 2.8 ± 0.9 | 0.299  | 3.1 ± 1.0 | 0.169  | 3.3 ± 1.0 | 0.103  | 2.7 ± 1.0 | 0.537 | 2.8 ± 1.0 | 0.999  | 14.7 ± 4.2 | 0.294  |
|                        | No                       | 2.6 ± 0.8 |        | 2.8 ± 0.8 |        | 3.0 ± 0.9 |        | 2.6 ± 0.9 |       | 2.8 ± 0.9 |        | 13.8 ± 3.7 |        |
| COVID-19 Vaccine Doses | One Dose                 | 2.2 ± 1.1 | 0.141  | 2.8 ± 0.8 | 0.613  | 2.6 ± 1.1 | 0.219  | 1.8 ± 0.8 | 0.039 | 1.6 ± 0.9 | 0.004  | 11.0 ± 3.5 | 0.020  |
|                        | Two Doses                | 3.0 ± 1.0 |        | 3.2 ± 1.1 |        | 3.4 ± 1.0 |        | 2.9 ± 1.0 |       | 3.0 ± 1.0 |        | 15.3 ± 4.3 |        |
|                        | Three Doses              | 2.8 ± 0.9 |        | 3.1 ± 1.0 |        | 3.2 ± 1.0 |        | 2.7 ± 0.9 |       | 2.8 ± 0.9 |        | 14.5 ± 4.2 |        |
|                        | Four Doses               | 3.1 ± 0.9 |        | 3.3 ± 1.0 |        | 3.6 ± 0.8 |        | 3.1 ± 1.1 |       | 3.4 ± 1.1 |        | 16.5 ± 4.4 |        |
| Influenza Vaccination  | Yes                      | 3.0 ± 0.9 | <0.001 | 3.3 ± 1.0 | 0.006  | 3.3 ± 0.9 | 0.244  | 2.8 ± 1.0 | 0.569 | 2.9 ± 1.0 | 0.090  | 15.3 ± 4.2 | 0.019  |
|                        | No                       | 2.7 ± 0.9 |        | 2.9 ± 1.0 |        | 3.2 ± 1.0 |        | 2.7 ± 1.0 |       | 2.7 ± 0.9 |        | 14.2 ± 4.1 |        |
| Last 12 Months         | Yes                      | 3.1 ± 0.9 | 0.313  | 3.4 ± 1.0 | 0.061  | 3.5 ± 0.9 | 0.019  | 3.0 ± 1.0 | 0.087 | 3.1 ± 1.0 | 0.128  | 16.1 ± 4.1 | 0.054  |
|                        | No                       | 2.9 ± 0.9 |        | 3.1 ± 0.9 |        | 3.2 ± 0.9 |        | 2.6 ± 0.9 |       | 2.8 ± 0.9 |        | 14.6 ± 4.1 |        |
| Undergrad Curriculum   | Yes                      | 3.5 ± 0.8 | <0.001 | 3.8 ± 0.8 | <0.001 | 3.9 ± 0.8 | <0.001 | 3.2 ± 0.8 | 0.010 | 3.4 ± 0.7 | <0.001 | 17.8 ± 3.2 | <0.001 |
|                        | No                       | 2.7 ± 0.9 |        | 3.0 ± 1.0 |        | 3.2 ± 1.0 |        | 2.7 ± 1.0 |       | 2.8 ± 1.0 |        | 14.3 ± 4.1 |        |
| Utilised Sources       | Ministry of Health       | 3.0 ± 0.9 | <0.001 | 3.2 ± 0.9 | <0.001 | 3.4 ± 0.8 | 0.017  | 2.9 ± 0.9 | 0.005 | 2.9 ± 0.9 | 0.002  | 15.4 ± 3.7 | <0.001 |
|                        | Public Health Institutes | 3.2 ± 0.8 | <0.001 | 3.5 ± 0.9 | <0.001 | 3.7 ± 0.9 | <0.001 | 3.1 ± 0.9 | 0.004 | 3.2 ± 1.0 | <0.001 | 16.6 ± 3.7 | <0.001 |
|                        | ECDC                     | 3.5 ± 1.1 | 0.003  | 3.5 ± 1.0 | 0.044  | 3.6 ± 1.0 | 0.117  | 3.2 ± 1.0 | 0.036 | 2.9 ± 1.0 | 0.631  | 16.8 ± 4.5 | 0.036  |

|                                 |                           |                   |       |                   |       |                   |        |                   |       |                   |       |                     |        |
|---------------------------------|---------------------------|-------------------|-------|-------------------|-------|-------------------|--------|-------------------|-------|-------------------|-------|---------------------|--------|
|                                 | US CDC                    | 4.0 ± 1.0         | 0.011 | 4.2 ± 0.8         | 0.011 | 4.2 ± 0.8         | 0.024  | 4.0 ± 1.0         | 0.011 | 3.6 ± 1.1         | 0.088 | 20.0 ± 4.5          | 0.015  |
|                                 | WHO                       | 3.2 ± 1.0         | 0.002 | 3.5 ± 0.9         | 0.001 | 3.6 ± 0.9         | <0.001 | 3.1 ± 0.9         | 0.005 | 3.1 ± 0.9         | 0.023 | 16.4 ± 3.8          | <0.001 |
|                                 | Professional Associations | 3.1 ± 0.9         | 0.016 | 3.3 ± 1.0         | 0.043 | 3.4 ± 1.0         | 0.154  | 2.9 ± 1.0         | 0.436 | 3.0 ± 0.9         | 0.110 | 15.8 ± 4.2          | 0.057  |
|                                 | Scientific Journals       | 3.1 ± 0.8         | 0.358 | 3.3 ± 0.8         | 0.363 | 3.4 ± 0.8         | 0.540  | 3.0 ± 1.2         | 0.381 | 3.2 ± 1.0         | 0.132 | 16.0 ± 4.4          | 0.261  |
|                                 | Social Media              | 2.7 ± 0.9         | 0.494 | 3.0 ± 0.9         | 0.686 | 3.4 ± 0.8         | 0.048  | 2.7 ± 0.9         | 0.607 | 2.8 ± 0.9         | 0.803 | 14.6 ± 3.5          | 0.886  |
|                                 | News Portals              | 2.8 ± 0.8         | 0.694 | 3.0 ± 0.9         | 0.548 | 3.3 ± 0.9         | 0.710  | 2.8 ± 0.9         | 0.075 | 2.9 ± 0.9         | 0.127 | 14.8 ± 3.9          | 0.506  |
| Overall Score: μ ± SD (min-max) |                           | 2.8 ± 0.9 (1 – 5) |       | 3.1 ± 1.0 (1 – 5) |       | 3.2 ± 1.0 (1 – 5) |        | 2.7 ± 1.0 (1 – 5) |       | 2.8 ± 1.0 (1 – 5) |       | 14.6 ± 4.2 (5 – 25) |        |

Kruskal-Wallis (H) test and Mann-Whitney (U) test were used with a significance level (*Sig.*) of ≤ 0.05. 4

Table S2. Factual Knowledge of Czech Healthcare Workers Responding to HMPXV Survey, September 2022, (n = 341) 5

| Question              |                                                                                        | Answer               | HMPXV<br>Vaccine<br>Rejection<br>(n = 153) | HMPXV<br>Vaccine<br>Hesitancy<br>(n = 158) | HMPXV<br>Vaccine<br>Acceptance<br>(n = 30) | Total<br>(n = 341) | Sig.  |
|-----------------------|----------------------------------------------------------------------------------------|----------------------|--------------------------------------------|--------------------------------------------|--------------------------------------------|--------------------|-------|
| Epidemiology          | The incubation period of human monkeypox ranges between ...                            | 3 – 7 days           | 11 (7.2%)                                  | 18 (11.4%)                                 | 4 (13.3%)                                  | 33 (9.7%)          | 0.293 |
|                       |                                                                                        | 7 – 21 days          | 95 (62.1%)                                 | 90 (57.0%)                                 | 18 (60.0%)                                 | 203 (59.5%)        | 0.653 |
|                       |                                                                                        | 21 – 28 days         | 2 (1.3%)                                   | 6 (3.8%)                                   | 2 (6.7%)                                   | 10 (2.9%)          | 0.151 |
|                       |                                                                                        | I do not know        | 45 (29.4%)                                 | 44 (27.8%)                                 | 6 (20.0%)                                  | 95 (27.9%)         | 0.575 |
|                       | The case-fatality ratio of human monkeypox usually ranges between ...                  | 4% and 11%           | 76 (49.7%)                                 | 76 (48.1%)                                 | 20 (66.7%)                                 | 172 (50.4%)        | 0.170 |
|                       |                                                                                        | 14% and 19%          | 7 (4.6%)                                   | 9 (5.7%)                                   | 2 (6.7%)                                   | 18 (5.3%)          | 0.764 |
|                       |                                                                                        | 20% and 30%          | 5 (3.3%)                                   | 7 (4.4%)                                   | 0 (0%)                                     | 12 (3.5%)          | 0.681 |
|                       |                                                                                        | I do not know        | 65 (42.5%)                                 | 66 (41.8%)                                 | 8 (26.7%)                                  | 139 (40.8%)        | 0.256 |
|                       | Monkeypox used to be endemic in ...                                                    | southeast Asia       | 8 (5.2%)                                   | 13 (8.2%)                                  | 3 (10.0%)                                  | 24 (7.0%)          | 0.429 |
|                       |                                                                                        | sub-Saharan Africa   | 99 (64.7%)                                 | 89 (56.3%)                                 | 16 (53.3%)                                 | 204 (59.8%)        | 0.241 |
|                       |                                                                                        | north America        | 1 (0.7%)                                   | 3 (1.9%)                                   | 0 (0%)                                     | 4 (1.2%)           | 0.739 |
|                       |                                                                                        | I do not know        | 45 (29.4%)                                 | 53 (33.5%)                                 | 11 (36.7%)                                 | 109 (32.0%)        | 0.624 |
| Clinical Presentation | Which of the following are symptoms of monkeypox infection?<br>(select all that apply) | Fever                | 124 (81.0%)                                | 122 (77.2%)                                | 28 (93.3%)                                 | 274 (80.4%)        | 0.120 |
|                       |                                                                                        | Chills               | 75 (49.0%)                                 | 71 (44.9%)                                 | 19 (63.3%)                                 | 165 (48.4%)        | 0.177 |
|                       |                                                                                        | Headache             | 92 (60.1%)                                 | 78 (49.4%)                                 | 19 (63.3%)                                 | 189 (55.4%)        | 0.107 |
|                       |                                                                                        | Myalgia              | 69 (45.1%)                                 | 64 (40.5%)                                 | 16 (53.3%)                                 | 149 (43.7%)        | 0.385 |
|                       |                                                                                        | Lymphadenopathy      | 71 (46.4%)                                 | 67 (42.4%)                                 | 18 (60.0%)                                 | 156 (45.7%)        | 0.203 |
|                       |                                                                                        | Fatigue              | 89 (58.2%)                                 | 80 (50.6%)                                 | 22 (73.3%)                                 | 191 (56.0%)        | 0.055 |
|                       |                                                                                        | Respiratory symptoms | 23 (15.0%)                                 | 21 (13.3%)                                 | 10 (33.3%)                                 | 54 (15.8%)         | 0.034 |

|                                                              |                                                                                          |                                                                                                                |                                                              |             |             |             |             |       |
|--------------------------------------------------------------|------------------------------------------------------------------------------------------|----------------------------------------------------------------------------------------------------------------|--------------------------------------------------------------|-------------|-------------|-------------|-------------|-------|
|                                                              | ... is/are the diagnostic feature(s) of monkeypox that distinguish(es) it from smallpox. | Skin and mucosal lesions                                                                                       | 121 (79.1%)                                                  | 128 (81.0%) | 27 (90.0%)  | 276 (80.9%) | 0.394       |       |
|                                                              |                                                                                          | I do not know                                                                                                  | 19 (12.4%)                                                   | 20 (12.7%)  | 1 (3.3%)    | 40 (11.7%)  | 0.383       |       |
|                                                              |                                                                                          | Lymphadenopathy                                                                                                | 62 (40.5%)                                                   | 59 (37.3%)  | 17 (56.7%)  | 138 (40.5%) | 0.142       |       |
|                                                              |                                                                                          | Fever                                                                                                          | 5 (3.3%)                                                     | 4 (2.5%)    | 0 (0%)      | 9 (2.6%)    | 0.784       |       |
|                                                              |                                                                                          | Respiratory symptoms                                                                                           | 24 (15.7%)                                                   | 25 (15.8%)  | 3 (10.0%)   | 52 (15.2%)  | 0.810       |       |
|                                                              |                                                                                          | I do not know                                                                                                  | 62 (40.5%)                                                   | 70 (44.3%)  | 10 (33.3%)  | 142 (41.6%) | 0.499       |       |
|                                                              | The possible locations to find monkeypox lesions are ...<br>(select all that apply)      | Genitalia                                                                                                      | 70 (45.8%)                                                   | 61 (38.6%)  | 16 (53.3%)  | 147 (43.1%) | 0.221       |       |
|                                                              |                                                                                          | Anus                                                                                                           | 41 (26.8%)                                                   | 47 (29.7%)  | 13 (43.3%)  | 101 (29.6%) | 0.193       |       |
|                                                              |                                                                                          | Extremities                                                                                                    | 92 (60.1%)                                                   | 97 (61.4%)  | 21 (70.0%)  | 210 (61.6%) | 0.595       |       |
|                                                              |                                                                                          | Chest                                                                                                          | 75 (49.0%)                                                   | 83 (52.5%)  | 22 (73.3%)  | 180 (52.8%) | 0.051       |       |
|                                                              |                                                                                          | Back                                                                                                           | 69 (45.1%)                                                   | 78 (49.4%)  | 21 (70.0%)  | 168 (49.3%) | 0.045       |       |
|                                                              |                                                                                          | Face and Mouth                                                                                                 | 80 (52.3%)                                                   | 96 (60.8%)  | 19 (63.3%)  | 195 (57.2%) | 0.248       |       |
|                                                              |                                                                                          | I do not know                                                                                                  | 35 (22.9%)                                                   | 39 (24.7%)  | 5 (16.7%)   | 79 (23.2%)  | 0.630       |       |
|                                                              | Risk Factors                                                                             | Human monkeypox can be transmitted through ...<br>(select all that apply)                                      | contact with respiratory secretions.                         | 64 (41.8%)  | 61 (38.6%)  | 16 (53.3%)  | 141 (41.3%) | 0.320 |
|                                                              |                                                                                          |                                                                                                                | touching objects and fabrics used by someone with monkeypox. | 49 (32.0%)  | 69 (43.7%)  | 19 (63.3%)  | 137 (40.2%) | 0.003 |
|                                                              |                                                                                          |                                                                                                                | direct contact with monkeypox rash, scabs or body fluids.    | 117 (76.5%) | 116 (73.4%) | 26 (86.7%)  | 259 (76.0%) | 0.292 |
|                                                              |                                                                                          |                                                                                                                | I do not know                                                | 26 (17.0%)  | 27 (17.1%)  | 2 (6.7%)    | 55 (16.1%)  | 0.372 |
|                                                              |                                                                                          | Vertical transmission, from a pregnant person to their fetus through placenta, of human monkeypox is possible. | True                                                         | 34 (22.2%)  | 33 (20.9%)  | 13 (43.3%)  | 80 (23.5%)  | 0.026 |
| False                                                        |                                                                                          |                                                                                                                | 17 (11.1%)                                                   | 16 (10.1%)  | 1 (3.3%)    | 34 (10.0%)  | 0.505       |       |
| I do not know                                                |                                                                                          |                                                                                                                | 102 (66.7%)                                                  | 109 (69.0%) | 16 (53.3%)  | 227 (66.6%) | 0.249       |       |
| Sexual transmission of human monkeypox is possible among ... |                                                                                          | homosexual partners only.                                                                                      | 9 (5.9%)                                                     | 13 (8.2%)   | 0 (0%)      | 22 (6.5%)   | 0.271       |       |
|                                                              |                                                                                          | heterosexual partners only.                                                                                    | 0 (0%)                                                       | 0 (0%)      | 0 (0%)      | 0 (0%)      | N/A         |       |
|                                                              |                                                                                          | both of homo- and heterosexual partners.                                                                       | 109 (71.2%)                                                  | 101 (63.9%) | 25 (83.3%)  | 235 (68.9%) | 0.077       |       |
|                                                              | I do not know                                                                            | 35 (22.9%)                                                                                                     | 44 (27.8%)                                                   | 5 (16.7%)   | 84 (24.6%)  | 0.340       |             |       |
| Vaccination                                                  | An effective vaccine against human monkeypox is to date available.                       | Ture                                                                                                           | 54 (35.3%)                                                   | 44 (27.8%)  | 17 (56.7%)  | 115 (33.7%) | 0.008       |       |
|                                                              |                                                                                          | False                                                                                                          | 28 (18.3%)                                                   | 41 (25.9%)  | 6 (20.0%)   | 75 (22.0%)  | 0.256       |       |
|                                                              |                                                                                          | I do not know                                                                                                  | 71 (46.4%)                                                   | 73 (46.2%)  | 7 (23.3%)   | 151 (44.3%) | 0.054       |       |
|                                                              | Pre-exposure Prophylaxis (PrEP) of monkeypox ...<br>(select all that apply)              | should be administered to healthcare professionals caring for monkeypox patients.                              | 55 (35.9%)                                                   | 65 (41.1%)  | 15 (50.0%)  | 135 (39.6%) | 0.306       |       |

|           |                                                                         |                                                                                                 |             |             |            |             |       |
|-----------|-------------------------------------------------------------------------|-------------------------------------------------------------------------------------------------|-------------|-------------|------------|-------------|-------|
| Treatment | Which vaccine(s) provide(s) cross-immunization against human monkeypox? | should be administered to laboratory workers dealing with orthopoxviruses samples and cultures. | 36 (23.5%)  | 41 (25.9%)  | 12 (40.0%) | 89 (26.1%)  | 0.171 |
|           |                                                                         | should be administered to individuals with close contact / exposure to monkeypox.               | 58 (37.9%)  | 61 (38.6%)  | 15 (50.0%) | 134 (39.3%) | 0.450 |
|           |                                                                         | can prevent onset of the disease, if administered until four days after exposure.               | 16 (10.5%)  | 21 (13.3%)  | 7 (23.3%)  | 44 (12.9%)  | 0.156 |
|           |                                                                         | I do not know                                                                                   | 65 (42.5%)  | 63 (39.9 %) | 10 (33.3%) | 138 (40.5%) | 0.633 |
|           |                                                                         | Chickenpox Vaccine                                                                              | 5 (3.3%)    | 7 (4.4%)    | 2 (6.7%)   | 14 (4.1%)   | 0.507 |
|           |                                                                         | Smallpox Vaccine                                                                                | 58 (37.9%)  | 59 (37.3%)  | 15 (50.0%) | 132 (38.7%) | 0.411 |
|           |                                                                         | COVID-19 Vaccine                                                                                | 0 (0%)      | 1 (0.6%)    | 2 (6.7%)   | 3 (0.9%)    | 0.021 |
|           |                                                                         | None of the above                                                                               | 12 (7.8%)   | 8 (5.1%)    | 3 (10.0%)  | 23 (6.7%)   | 0.438 |
|           |                                                                         | I do not know                                                                                   | 78 (51.0%)  | 83 (52.5%)  | 8 (26.7%)  | 169 (49.6%) | 0.031 |
|           | Effective drugs against human monkeypox are to date available.          | Ture                                                                                            | 36 (23.5%)  | 43 (27.2%)  | 7 (23.3%)  | 86 (25.2%)  | 0.733 |
|           |                                                                         | False                                                                                           | 39 (25.5%)  | 28 (17.7%)  | 13 (43.3%) | 80 (23.5%)  | 0.007 |
|           |                                                                         | I do not know                                                                                   | 78 (51.0%)  | 87 (55.1%)  | 10 (33.3%) | 175 (51.3%) | 0.092 |
|           | For severe monkeypox cases, ... can be used.<br>(select all that apply) | tecovirimat                                                                                     | 16 (10.5%)  | 21 (13.3%)  | 3 (10.0%)  | 40 (11.7%)  | 0.745 |
|           |                                                                         | brincidofovir                                                                                   | 1 (0.7%)    | 3 (1.9%)    | 1 (3.3%)   | 5 (1.5%)    | 0.293 |
|           |                                                                         | cidofovir                                                                                       | 3 (2.0%)    | 8 (5.1%)    | 2 (6.7%)   | 13 (3.8%)   | 0.202 |
|           |                                                                         | I do not know                                                                                   | 135 (88.2%) | 131 (82.9%) | 24 (80.0%) | 290 (85.0%) | 0.257 |
|           | For most cases, monkeypox virus infection leads to ...                  | mild and self-limiting clinical course.                                                         | 75 (49.0%)  | 75 (47.5%)  | 15 (50.0%) | 165 (48.4%) | 0.947 |
|           |                                                                         | moderate yet life-threatening clinical course.                                                  | 43 (28.1%)  | 39 (24.7%)  | 7 (23.3%)  | 89 (26.1%)  | 0.740 |
|           |                                                                         | fatal and life-threatening clinical course.                                                     | 7 (4.6%)    | 5 (3.2%)    | 3 (10.0%)  | 15 (4.4%)   | 0.159 |
|           |                                                                         | I do not know                                                                                   | 28 (18.3%)  | 39 (24.7%)  | 5 (16.7%)  | 72 (21.1%)  | 0.318 |

Chi-squared ( $\chi^2$ ) test and Fisher's exact test were used with a significance level (*Sig.*) of  $\leq 0.05$ .

**Table S3.** Predictors of HMPXV-related Factual Knowledge of Czech Healthcare Workers Responding to HMPXV Survey, September 2022, (*n* = 341)

7

| Variable                  | Outcome               | Epidemiology | Sig.  | Clinical<br>Presentation | Sig.  | Risk Factors | Sig.  | Vaccination | Sig.  | Treatment | Sig.  | Total      | Sig.  |
|---------------------------|-----------------------|--------------|-------|--------------------------|-------|--------------|-------|-------------|-------|-----------|-------|------------|-------|
| Gender                    | Female                | 1.7 ± 1.1    | 0.564 | 3.1 ± 1.6                | 0.345 | 2.3 ± 1.2    | 0.517 | 1.5 ± 1.2   | 0.806 | 0.9 ± 0.9 | 0.669 | 9.4 ± 4.5  | 0.916 |
|                           | Male                  | 1.8 ± 1.2    |       | 3.1 ± 1.7                |       | 2.1 ± 1.2    |       | 1.6 ± 1.2   |       | 0.9 ± 1.1 |       | 9.4 ± 5.3  |       |
|                           | Prefer not to say     | 2.2 ± 0.9    |       | 2.4 ± 0.6                |       | 2.0 ± 0.7    |       | 1.6 ± 0.9   |       | 1.0 ± 1.0 |       | 9.2 ± 2.3  |       |
| Sexual<br>Orientation     | Heterosexual          | 1.7 ± 1.1    | 0.694 | 3.0 ± 1.5                | 0.798 | 2.3 ± 1.2    | 0.181 | 1.5 ± 1.2   | 0.892 | 0.9 ± 0.9 | 0.470 | 9.5 ± 4.6  | 0.785 |
|                           | Homosexual            | 2.1 ± 0.8    |       | 3.3 ± 1.3                |       | 2.9 ± 0.6    |       | 1.4 ± 1.3   |       | 0.8 ± 0.7 |       | 10.4 ± 3.3 |       |
|                           | Bisexual              | 1.4 ± 1.3    |       | 3.4 ± 1.9                |       | 2.0 ± 1.2    |       | 1.2 ± 1.3   |       | 0.6 ± 0.9 |       | 8.6 ± 5.8  |       |
|                           | Prefer not to say     | 1.7 ± 1.1    |       | 2.9 ± 1.4                |       | 2.0 ± 1.1    |       | 1.5 ± 1.2   |       | 0.7 ± 0.7 |       | 8.7 ± 4.4  |       |
| Age Group                 | ≤ 47 years-old        | 1.8 ± 1.1    | 0.107 | 3.2 ± 1.5                | 0.006 | 2.4 ± 1.2    | 0.004 | 1.6 ± 1.2   | 0.305 | 0.9 ± 0.9 | 0.618 | 10.0 ± 4.6 | 0.013 |
|                           | > 47 years-old        | 1.6 ± 1.1    |       | 2.8 ± 1.5                |       | 2.1 ± 1.1    |       | 1.5 ± 1.2   |       | 0.9 ± 0.9 |       | 8.9 ± 4.5  |       |
| Marital Status            | Single                | 1.6 ± 1.1    | 0.647 | 3.3 ± 1.5                | 0.060 | 2.5 ± 1.3    | 0.028 | 1.6 ± 1.1   | 0.432 | 0.8 ± 0.8 | 0.281 | 9.8 ± 4.4  | 0.161 |
|                           | Married               | 1.7 ± 1.1    |       | 3.1 ± 1.5                |       | 2.3 ± 1.1    |       | 1.5 ± 1.3   |       | 1.0 ± 0.9 |       | 9.6 ± 4.5  |       |
|                           | Divorced              | 1.8 ± 1.1    |       | 2.8 ± 1.6                |       | 2.2 ± 1.1    |       | 1.3 ± 1.2   |       | 0.7 ± 0.8 |       | 8.7 ± 4.9  |       |
|                           | Widow                 | 1.1 ± 1.2    |       | 1.8 ± 1.9                |       | 1.1 ± 1.4    |       | 1.1 ± 0.8   |       | 1.0 ± 0.8 |       | 6.1 ± 4.4  |       |
|                           | Prefer not to say     | 1.8 ± 1.1    |       | 2.6 ± 1.5                |       | 1.9 ± 1.1    |       | 1.8 ± 1.3   |       | 0.9 ± 0.8 |       | 9.0 ± 4.9  |       |
| Having<br>Minors          | Yes                   | 1.8 ± 1.2    | 0.132 | 3.2 ± 1.5                | 0.196 | 2.4 ± 1.2    | 0.165 | 1.6 ± 1.3   | 0.306 | 1.0 ± 0.9 | 0.212 | 9.9 ± 4.8  | 0.064 |
|                           | No                    | 1.6 ± 1.1    |       | 3.0 ± 1.5                |       | 2.2 ± 1.1    |       | 1.5 ± 1.2   |       | 0.9 ± 0.9 |       | 9.1 ± 4.4  |       |
| Location                  | South Moravian Region | 1.7 ± 1.1    | 0.670 | 3.0 ± 1.5                | 0.357 | 2.2 ± 1.2    | 0.244 | 1.5 ± 1.2   | 0.238 | 0.9 ± 0.9 | 0.532 | 9.2 ± 4.7  | 0.478 |
|                           | Other Regions         | 1.7 ± 1.1    |       | 3.1 ± 1.5                |       | 2.4 ± 1.1    |       | 1.6 ± 1.3   |       | 0.9 ± 0.9 |       | 9.7 ± 4.3  |       |
| Profession                | Medical               | 1.9 ± 1.1    | 0.346 | 3.3 ± 1.6                | 0.199 | 2.5 ± 1.1    | 0.274 | 2.1 ± 1.3   | 0.005 | 1.4 ± 1.2 | 0.006 | 11.1 ± 4.7 | 0.021 |
|                           | Allied HCPs           | 1.7 ± 1.1    |       | 3.0 ± 1.5                |       | 2.3 ± 1.2    |       | 1.5 ± 1.2   |       | 0.8 ± 0.8 |       | 9.2 ± 4.5  |       |
| Providing<br>Care         | Yes                   | 1.8 ± 1.1    | 0.681 | 3.4 ± 1.7                | 0.149 | 2.6 ± 1.4    | 0.158 | 1.7 ± 1.4   | 0.667 | 1.1 ± 1.2 | 0.785 | 10.6 ± 5.7 | 0.201 |
|                           | No                    | 1.7 ± 1.1    |       | 3.0 ± 1.5                |       | 2.3 ± 1.2    |       | 1.5 ± 1.3   |       | 0.9 ± 0.9 |       | 9.4 ± 4.5  |       |
| Chronic<br>Illnesses      | Yes                   | 1.7 ± 1.1    | 0.672 | 3.0 ± 1.5                | 0.604 | 2.2 ± 1.2    | 0.384 | 1.6 ± 1.2   | 0.409 | 0.9 ± 0.8 | 0.998 | 9.4 ± 4.5  | 0.882 |
|                           | No                    | 1.7 ± 1.1    |       | 3.1 ± 1.5                |       | 2.3 ± 1.2    |       | 1.5 ± 1.3   |       | 0.9 ± 0.9 |       | 9.5 ± 4.6  |       |
| Medical<br>Treatments     | Yes                   | 1.6 ± 1.1    | 0.162 | 2.9 ± 1.6                | 0.216 | 2.2 ± 1.2    | 0.120 | 1.5 ± 1.3   | 0.931 | 0.8 ± 0.9 | 0.233 | 9.1 ± 4.6  | 0.177 |
|                           | No                    | 1.8 ± 1.1    |       | 3.1 ± 1.5                |       | 2.4 ± 1.2    |       | 1.5 ± 1.2   |       | 1.0 ± 0.9 |       | 9.7 ± 4.5  |       |
| COVID-19<br>Vaccination   | Yes                   | 1.7 ± 1.1    | 0.183 | 3.1 ± 1.5                | 0.777 | 2.3 ± 1.2    | 0.852 | 1.6 ± 1.2   | 0.112 | 0.9 ± 0.9 | 0.396 | 9.5 ± 4.6  | 0.758 |
|                           | No                    | 2.0 ± 1.0    |       | 3.0 ± 1.5                |       | 2.2 ± 1.2    |       | 1.2 ± 1.1   |       | 1.0 ± 0.8 |       | 9.3 ± 4.1  |       |
| COVID-19<br>Vaccine Doses | One Dose              | 1.4 ± 1.5    | 0.109 | 3.4 ± 1.5                | 0.009 | 2.6 ± 1.3    | 0.001 | 1.6 ± 1.5   | 0.323 | 0.4 ± 0.5 | 0.382 | 9.4 ± 4.7  | 0.008 |
|                           | Two Doses             | 1.9 ± 1.1    |       | 3.6 ± 1.4                |       | 2.9 ± 1.1    |       | 1.7 ± 1.2   |       | 1.1 ± 1.0 |       | 11.1 ± 4.0 |       |

|                                       |                           |                   |        |                   |        |                   |        |                   |        |                   |       |                    |        |
|---------------------------------------|---------------------------|-------------------|--------|-------------------|--------|-------------------|--------|-------------------|--------|-------------------|-------|--------------------|--------|
|                                       | Three Doses               | 1.6 ± 1.1         |        | 2.9 ± 1.5         |        | 2.2 ± 1.2         |        | 1.5 ± 1.2         |        | 0.9 ± 0.9         |       | 9.0 ± 4.6          |        |
|                                       | Four Doses                | 2.1 ± 1.1         |        | 3.7 ± 1.7         |        | 2.6 ± 1.1         |        | 2.0 ± 1.2         |        | 1.0 ± 0.9         |       | 11.5 ± 4.6         |        |
| Influenza Vaccination                 | Yes                       | 1.7 ± 1.1         | 0.871  | 2.9 ± 1.6         | 0.343  | 2.2 ± 1.1         | 0.173  | 1.7 ± 1.3         | 0.069  | 0.9 ± 0.9         | 0.792 | 9.4 ± 4.7          | 0.774  |
|                                       | No                        | 1.7 ± 1.1         |        | 3.1 ± 1.5         |        | 2.3 ± 1.2         |        | 1.4 ± 1.2         |        | 0.9 ± 0.9         |       | 9.5 ± 4.5          |        |
| Last 12 Months                        | Yes                       | 1.8 ± 1.1         | 0.181  | 3.3 ± 1.5         | 0.018  | 2.3 ± 1.0         | 0.658  | 1.8 ± 1.3         | 0.378  | 1.1 ± 1.0         | 0.059 | 10.2 ± 4.7         | 0.088  |
|                                       | No                        | 1.6 ± 1.1         |        | 2.6 ± 1.6         |        | 2.1 ± 1.2         |        | 1.6 ± 1.3         |        | 0.7 ± 0.8         |       | 8.7 ± 4.6          |        |
| Undergrad Curriculum                  | Yes                       | 2.6 ± 0.8         | <0.001 | 3.8 ± 1.0         | 0.013  | 3.0 ± 0.8         | 0.001  | 2.7 ± 0.9         | <0.001 | 1.2 ± 1.2         | 0.351 | 13.2 ± 3.0         | <0.001 |
|                                       | No                        | 1.6 ± 1.1         |        | 3.0 ± 1.5         |        | 2.2 ± 1.2         |        | 1.4 ± 1.2         |        | 0.9 ± 0.9         |       | 9.1 ± 4.5          |        |
| Utilised Sources                      | Ministry of Health        | 1.9 ± 1.0         | 0.012  | 3.3 ± 1.3         | 0.001  | 2.5 ± 1.1         | 0.001  | 1.7 ± 1.3         | 0.042  | 1.0 ± 0.9         | 0.277 | 10.3 ± 4.2         | <0.001 |
|                                       | Public Health Institutes  | 2.2 ± 0.9         | 0.001  | 3.7 ± 1.2         | 0.002  | 2.6 ± 1.0         | 0.105  | 2.0 ± 1.3         | 0.002  | 1.2 ± 1.0         | 0.046 | 11.5 ± 3.8         | <0.001 |
|                                       | ECDC                      | 2.1 ± 1.1         | 0.102  | 3.7 ± 1.4         | 0.080  | 2.9 ± 1.1         | 0.012  | 2.2 ± 1.4         | 0.028  | 1.5 ± 1.2         | 0.031 | 12.4 ± 4.6         | 0.006  |
|                                       | US CDC                    | 2.8 ± 0.5         | 0.020  | 4.4 ± 0.9         | 0.031  | 3.2 ± 0.5         | 0.052  | 3.2 ± 0.9         | 0.005  | 1.6 ± 0.9         | 0.074 | 15.2 ± 2.3         | 0.003  |
|                                       | WHO                       | 2.2 ± 1.0         | <0.001 | 3.9 ± 1.1         | <0.001 | 3.0 ± 0.7         | <0.001 | 2.1 ± 1.2         | <0.001 | 1.1 ± 1.0         | 0.127 | 12.3 ± 3.2         | <0.001 |
|                                       | Professional Associations | 2.0 ± 1.0         | 0.143  | 3.3 ± 1.3         | 0.262  | 2.5 ± 1.1         | 0.177  | 1.8 ± 1.4         | 0.129  | 1.1 ± 0.9         | 0.141 | 10.7 ± 3.9         | 0.064  |
|                                       | Scientific Journals       | 2.5 ± 0.7         | 0.002  | 4.1 ± 1.0         | 0.003  | 2.3 ± 0.7         | 0.328  | 2.2 ± 1.1         | 0.018  | 1.0 ± 0.8         | 0.642 | 12.2 ± 2.7         | 0.006  |
|                                       | Social Media              | 1.8 ± 1.2         | 0.262  | 3.1 ± 1.6         | 0.507  | 2.4 ± 1.1         | 0.166  | 1.5 ± 1.2         | 0.632  | 0.9 ± 0.9         | 0.685 | 9.7 ± 4.7          | 0.600  |
|                                       | News Portals              | 1.7 ± 1.3         | 0.959  | 3.2 ± 1.5         | 0.178  | 2.3 ± 1.1         | 0.617  | 1.6 ± 1.3         | 0.312  | 1.0 ± 0.9         | 0.226 | 9.7 ± 4.4          | 0.457  |
| Overall Score: $\mu \pm SD$ (min-max) |                           | 1.7 ± 1.1 (0 – 3) |        | 3.0 ± 1.5 (0 – 5) |        | 2.3 ± 1.2 (0 – 4) |        | 1.5 ± 1.2 (0 – 4) |        | 0.9 ± 0.9 (0 – 4) |       | 9.4 ± 4.6 (0 – 20) |        |

Kruskal-Wallis (H) test and Mann-Whitney (U) test were used with a significance level (*Sig.*) of  $\leq 0.05$ .

**Table S4.** Predictors of HMPXV vaccine-related Perceptions and Acceptance of Czech Healthcare Workers Responding to HMPXV Survey, September 2022, (*n* = 341)

9

| Variable               | Outcome               | Perceived Susceptibility | Sig.  | Perceived Severity | Sig.  | Perceived Benefits | Sig.   | Perceived Barriers | Sig.  | Cues to Action | Sig.   | Acceptance | Sig.   |
|------------------------|-----------------------|--------------------------|-------|--------------------|-------|--------------------|--------|--------------------|-------|----------------|--------|------------|--------|
| Gender                 | Female                | 6.6 ± 2.4                | 0.468 | 9.1 ± 2.2          | 0.477 | 9.8 ± 2.1          | 0.273  | 6.0 ± 1.7          | 0.067 | 9.2 ± 2.6      | 0.358  | 2.5 ± 0.9  | 0.472  |
|                        | Male                  | 6.5 ± 2.8                |       | 9.6 ± 2.5          |       | 10.4 ± 2.1         |        | 5.3 ± 2.0          |       | 10.0 ± 3.2     |        | 2.7 ± 1.2  |        |
|                        | Prefer not to say     | 5.4 ± 2.5                |       | 9.6 ± 2.3          |       | 10.8 ± 1.6         |        | 5.8 ± 1.5          |       | 9.6 ± 1.5      |        | 2.8 ± 0.4  |        |
| Sexual Orientation     | Heterosexual          | 6.6 ± 2.5                | 0.684 | 9.1 ± 2.3          | 0.736 | 9.8 ± 2.2          | 0.427  | 5.9 ± 1.8          | 0.542 | 9.3 ± 2.7      | 0.289  | 2.5 ± 0.9  | 0.514  |
|                        | Homosexual            | 7.9 ± 3.6                |       | 8.5 ± 1.3          |       | 10.1 ± 2.6         |        | 6.0 ± 1.9          |       | 10.8 ± 3.2     |        | 3.0 ± 1.2  |        |
|                        | Bisexual              | 6.6 ± 3.6                |       | 10.0 ± 2.3         |       | 11.4 ± 2.9         |        | 6.8 ± 1.3          |       | 10.6 ± 2.9     |        | 2.6 ± 1.5  |        |
|                        | Prefer not to say     | 6.6 ± 2.3                |       | 9.3 ± 2.0          |       | 10.1 ± 1.4         |        | 5.9 ± 1.6          |       | 8.7 ± 2.7      |        | 2.4 ± 0.8  |        |
| Age Group              | ≤ 47 years-old        | 6.8 ± 2.6                | 0.218 | 9.2 ± 2.3          | 0.780 | 9.9 ± 2.2          | 0.983  | 6.2 ± 1.9          | 0.034 | 9.4 ± 3.0      | 0.376  | 2.5 ± 1.0  | 0.919  |
|                        | > 47 years-old        | 6.4 ± 2.4                |       | 9.0 ± 2.2          |       | 9.8 ± 2.0          |        | 5.7 ± 1.5          |       | 9.2 ± 2.4      |        | 2.5 ± 0.9  |        |
|                        | Single                | 7.0 ± 2.8                |       | 9.4 ± 2.8          |       | 10.2 ± 2.2         |        | 6.0 ± 2.1          |       | 9.9 ± 3.2      |        | 2.8 ± 1.2  |        |
| Marital Status         | Married               | 6.5 ± 2.4                | 0.782 | 9.0 ± 2.1          | 0.954 | 9.8 ± 2.2          | 0.416  | 5.9 ± 1.7          | 0.333 | 9.4 ± 2.5      | 0.034  | 2.4 ± 0.9  | 0.111  |
|                        | Divorced              | 6.4 ± 2.6                |       | 9.1 ± 1.9          |       | 9.5 ± 1.9          |        | 6.5 ± 1.6          |       | 8.2 ± 2.7      |        | 2.3 ± 0.9  |        |
|                        | Widow                 | 6.4 ± 1.6                |       | 8.9 ± 1.8          |       | 10.3 ± 1.6         |        | 6.0 ± 1.2          |       | 9.1 ± 1.1      |        | 2.3 ± 0.7  |        |
|                        | Prefer not to say     | 6.8 ± 2.4                |       | 9.0 ± 2.6          |       | 10.1 ± 1.6         |        | 5.8 ± 1.6          |       | 8.8 ± 2.5      |        | 2.4 ± 0.8  |        |
| Having Minors          | Yes                   | 6.4 ± 2.4                | 0.150 | 8.7 ± 2.2          | 0.012 | 9.7 ± 2.2          | 0.130  | 5.9 ± 1.8          | 0.849 | 8.9 ± 2.7      | 0.049  | 2.3 ± 0.9  | 0.005  |
|                        | No                    | 6.8 ± 2.5                |       | 9.3 ± 2.2          |       | 10.0 ± 2.1         |        | 6.0 ± 1.7          |       | 9.5 ± 2.7      |        | 2.6 ± 1.0  |        |
| Location               | South Moravian Region | 6.6 ± 2.4                | 0.900 | 9.2 ± 2.2          | 0.325 | 9.7 ± 2.0          | 0.057  | 6.0 ± 1.6          | 0.319 | 9.0 ± 2.7      | 0.015  | 2.4 ± 0.9  | 0.090  |
|                        | Other Regions         | 6.6 ± 2.6                |       | 9.0 ± 2.3          |       | 10.1 ± 2.3         |        | 5.9 ± 1.9          |       | 9.7 ± 2.6      |        | 2.6 ± 1.0  |        |
| Profession             | Medical               | 6.6 ± 2.7                | 0.894 | 9.3 ± 2.4          | 0.697 | 10.1 ± 2.2         | 0.375  | 5.5 ± 1.4          | 0.132 | 10.3 ± 3.0     | 0.045  | 2.8 ± 1.0  | 0.053  |
|                        | Allied HCPs           | 6.6 ± 2.5                |       | 9.1 ± 2.2          |       | 9.8 ± 2.1          |        | 6.0 ± 1.8          |       | 9.2 ± 2.6      |        | 2.5 ± 0.9  |        |
| Providing Care         | Yes                   | 7.4 ± 3.3                | 0.272 | 9.1 ± 2.4          | 0.688 | 9.9 ± 1.8          | 0.903  | 6.6 ± 1.8          | 0.164 | 10.3 ± 2.5     | 0.144  | 2.6 ± 1.0  | 0.608  |
|                        | No                    | 6.6 ± 2.4                |       | 9.1 ± 2.2          |       | 9.9 ± 2.2          |        | 5.9 ± 1.7          |       | 9.3 ± 2.7      |        | 2.5 ± 0.9  |        |
| Chronic Illnesses      | Yes                   | 6.7 ± 2.6                | 0.565 | 9.3 ± 2.1          | 0.473 | 10.3 ± 1.9         | 0.014  | 6.1 ± 1.8          | 0.316 | 9.7 ± 2.5      | 0.021  | 2.5 ± 0.9  | 0.707  |
|                        | No                    | 6.5 ± 2.4                |       | 9.0 ± 2.3          |       | 9.6 ± 2.3          |        | 5.9 ± 1.7          |       | 9.0 ± 2.7      |        | 2.5 ± 0.9  |        |
| Medical Treatments     | Yes                   | 6.6 ± 2.5                | 0.703 | 9.3 ± 2.1          | 0.333 | 10.2 ± 2.0         | 0.010  | 6.0 ± 1.8          | 0.489 | 9.6 ± 2.6      | 0.028  | 2.5 ± 0.9  | 0.337  |
|                        | No                    | 6.7 ± 2.5                |       | 8.9 ± 2.3          |       | 9.6 ± 2.2          |        | 5.9 ± 1.7          |       | 9.0 ± 2.7      |        | 2.4 ± 1.0  |        |
| COVID-19 Vaccination   | Yes                   | 6.7 ± 2.5                | 0.048 | 9.2 ± 2.2          | 0.016 | 10.0 ± 2.1         | <0.001 | 5.9 ± 1.6          | 0.004 | 9.6 ± 2.6      | <0.001 | 2.6 ± 0.9  | <0.001 |
|                        | No                    | 5.8 ± 2.0                |       | 8.1 ± 2.1          |       | 8.6 ± 1.8          |        | 6.9 ± 2.4          |       | 6.7 ± 2.4      |        | 1.8 ± 0.8  |        |
| COVID-19 Vaccine Doses | One Dose              | 5.6 ± 3.6                | 0.186 | 8.2 ± 1.9          | 0.585 | 7.4 ± 4.3          | 0.006  | 6.4 ± 2.3          | 0.030 | 7.2 ± 3.9      | 0.190  | 2.0 ± 1.0  | 0.023  |
|                        | Two Doses             | 6.4 ± 2.4                |       | 9.1 ± 2.2          |       | 9.7 ± 2.3          |        | 6.4 ± 1.6          |       | 9.4 ± 2.4      |        | 2.4 ± 0.9  |        |



|                                       |                           |                    |       |                    |       |                    |       |                    |       |                    |       |                   |        |
|---------------------------------------|---------------------------|--------------------|-------|--------------------|-------|--------------------|-------|--------------------|-------|--------------------|-------|-------------------|--------|
|                                       | Three Doses               | 6.8 ± 2.5          |       | 9.2 ± 2.2          |       | 10.0 ± 2.0         |       | 5.8 ± 1.6          |       | 9.6 ± 2.5          |       | 2.6 ± 0.9         |        |
|                                       | Four Doses                | 5.6 ± 2.7          |       | 9.6 ± 2.4          |       | 11.6 ± 2.2         |       | 5.1 ± 2.4          |       | 10.7 ± 2.6         |       | 3.1 ± 0.9         |        |
| Influenza Vaccination                 | Yes                       | 6.7 ± 2.6          | 0.510 | 9.1 ± 2.4          | 0.907 | 10.2 ± 2.3         | 0.011 | 5.8 ± 1.8          | 0.128 | 9.8 ± 2.8          | 0.003 | 2.7 ± 1.0         | <0.001 |
|                                       | No                        | 6.5 ± 2.4          |       | 9.1 ± 2.1          |       | 9.7 ± 2.1          |       | 6.1 ± 1.7          |       | 9.0 ± 2.6          |       | 2.4 ± 0.9         |        |
| Last 12 Months                        | Yes                       | 6.8 ± 2.7          | 0.989 | 8.9 ± 2.5          | 0.345 | 10.5 ± 2.3         | 0.134 | 5.7 ± 1.7          | 0.588 | 10.0 ± 2.7         | 0.514 | 3.0 ± 0.8         | 0.002  |
|                                       | No                        | 6.7 ± 2.5          |       | 9.2 ± 2.3          |       | 9.9 ± 2.2          |       | 5.9 ± 1.8          |       | 9.6 ± 2.9          |       | 2.4 ± 1.0         |        |
| Undergrad Curriculum                  | Yes                       | 6.9 ± 2.6          | 0.529 | 9.2 ± 1.5          | 0.607 | 10.6 ± 2.2         | 0.160 | 5.6 ± 1.6          | 0.428 | 10.0 ± 2.4         | 0.223 | 2.8 ± 0.8         | 0.093  |
|                                       | No                        | 6.6 ± 2.5          |       | 9.1 ± 2.3          |       | 9.8 ± 2.1          |       | 6.0 ± 1.8          |       | 9.3 ± 2.7          |       | 2.5 ± 0.9         |        |
| Utilised Sources                      | Ministry of Health        | 6.8 ± 2.2          | 0.046 | 9.0 ± 2.1          | 0.496 | 10.0 ± 2.1         | 0.290 | 5.9 ± 1.8          | 0.965 | 9.6 ± 2.7          | 0.024 | 2.6 ± 0.9         | 0.070  |
|                                       | Public Health Institutes  | 6.7 ± 2.4          | 0.932 | 9.0 ± 2.1          | 0.679 | 10.2 ± 2.5         | 0.124 | 5.8 ± 1.8          | 0.428 | 9.7 ± 2.7          | 0.350 | 2.7 ± 0.9         | 0.060  |
|                                       | ECDC                      | 6.5 ± 2.4          | 0.781 | 8.8 ± 1.9          | 0.671 | 9.9 ± 2.8          | 0.674 | 5.3 ± 1.4          | 0.080 | 10.1 ± 2.3         | 0.295 | 2.9 ± 0.9         | 0.090  |
|                                       | US CDC                    | 8.8 ± 3.1          | 0.093 | 9.2 ± 2.5          | 0.951 | 11.8 ± 2.8         | 0.135 | 4.8 ± 1.3          | 0.105 | 12.0 ± 3.5         | 0.058 | 3.6 ± 1.1         | 0.022  |
|                                       | WHO                       | 6.7 ± 2.4          | 0.732 | 9.0 ± 2.3          | 0.783 | 10.4 ± 2.3         | 0.029 | 5.8 ± 1.9          | 0.293 | 9.8 ± 2.4          | 0.117 | 2.7 ± 0.9         | 0.033  |
|                                       | Professional Associations | 6.8 ± 2.5          | 0.855 | 9.4 ± 2.3          | 0.296 | 10.1 ± 2.4         | 0.192 | 5.9 ± 1.9          | 0.420 | 9.5 ± 2.7          | 0.960 | 2.6 ± 1.0         | 0.497  |
|                                       | Scientific Journals       | 7.2 ± 2.4          | 0.276 | 9.8 ± 2.5          | 0.293 | 10.8 ± 1.7         | 0.052 | 5.6 ± 1.9          | 0.492 | 10.6 ± 2.3         | 0.050 | 3.1 ± 0.8         | 0.004  |
|                                       | Social Media              | 6.7 ± 2.5          | 0.638 | 9.0 ± 2.2          | 0.414 | 9.6 ± 1.9          | 0.097 | 6.0 ± 1.7          | 0.557 | 9.3 ± 2.2          | 0.696 | 2.5 ± 0.9         | 0.695  |
|                                       | News Portals              | 6.5 ± 2.6          | 0.385 | 9.1 ± 2.1          | 0.553 | 10.1 ± 2.1         | 0.152 | 5.9 ± 1.7          | 0.737 | 9.5 ± 2.5          | 0.391 | 2.5 ± 1.0         | 0.368  |
| Overall Score: $\mu \pm$ SD (min-max) |                           | 6.6 ± 2.5 (3 – 15) |       | 9.1 ± 2.2 (3 – 15) |       | 9.9 ± 2.1 (3 – 15) |       | 6.0 ± 1.7 (2 – 10) |       | 9.3 ± 2.7 (3 – 15) |       | 2.5 ± 0.9 (1 – 5) |        |

Kruskal-Wallis (H) test and Mann-Whitney (U) test were used with a significance level (*Sig.*) of  $\leq 0.05$ .
